# Supplementary material for: Neuron loss in the brain starts in childhood, increases exponentially with age and is halted by GM-CSF treatment in Alzheimer’s disease
Source: bioRxiv or medRxiv preprint supplement (doi:10.1101/2024.07.14.24310223), 2024-07-15
Supplement: Supplementary file [file media-2.pdf]

The FREQ Procedure

| Table 1 of Treatment by sex            |             |            |       |
|----------------------------------------|-------------|------------|-------|
| Controlling for data_set=Leukine Study |             |            |       |
| Treatment                              | sex         |            |       |
|                                        | Female      | Male       | Total |
| External AD                            | 0<br>.      | 0<br>.     | 0     |
| External Controls                      | 0<br>.      | 0<br>.     | 0     |
| External MCI                           | 0<br>.      | 0<br>.     | 0     |
| External T21                           | 0<br>.      | 0<br>.     | 0     |
| Leukine                                | 12<br>60.00 | 8<br>40.00 | 20    |
| Placebo                                | 11<br>55.00 | 9<br>45.00 | 20    |
| <b>Total</b>                           | 23          | 17         | 40    |

| Table 2 of Treatment by sex     |             |             |       |
|---------------------------------|-------------|-------------|-------|
| Controlling for data_set=Bio AD |             |             |       |
| Treatment                       | sex         |             |       |
|                                 | Female      | Male        | Total |
| External AD                     | 6<br>46.15  | 7<br>53.85  | 13    |
| External Controls               | 48<br>69.57 | 21<br>30.43 | 69    |
| External MCI                    | 16<br>50.00 | 16<br>50.00 | 32    |
| External T21                    | 0<br>.      | 0<br>.      | 0     |
| Leukine                         | 0<br>.      | 0<br>.      | 0     |
| Placebo                         | 0<br>.      | 0<br>.      | 0     |
| <b>Total</b>                    | 70          | 44          | 114   |

| Table 3 of Treatment by sex  |              |              |       |
|------------------------------|--------------|--------------|-------|
| Controlling for data_set=HTP |              |              |       |
| Treatment                    | sex          |              |       |
|                              | Female       | Male         | Total |
| External AD                  | 0<br>.       | 0<br>.       | 0     |
| External Controls            | 56<br>54.37  | 47<br>45.63  | 103   |
| External MCI                 | 0<br>.       | 0<br>.       | 0     |
| External T21                 | 150<br>47.47 | 166<br>52.53 | 316   |

The FREQ Procedure

Frequency  
Row Pct

| Table 3 of Treatment by sex  |        |        |       |
|------------------------------|--------|--------|-------|
| Controlling for data_set=HTP |        |        |       |
| Treatment                    | sex    |        |       |
|                              | Female | Male   | Total |
| Leukine                      | 0<br>. | 0<br>. | 0     |
| Placebo                      | 0<br>. | 0<br>. | 0     |
| <b>Total</b>                 | 206    | 213    | 419   |

Frequency  
Row Pct

| Table 4 of Treatment by sex   |             |             |       |
|-------------------------------|-------------|-------------|-------|
| Controlling for data_set=Nair |             |             |       |
| Treatment                     | sex         |             |       |
|                               | Female      | Male        | Total |
| External AD                   | 0<br>.      | 0<br>.      | 0     |
| External Controls             | 93<br>64.14 | 52<br>35.86 | 145   |
| External MCI                  | 0<br>.      | 0<br>.      | 0     |
| External T21                  | 0<br>.      | 0<br>.      | 0     |
| Leukine                       | 0<br>.      | 0<br>.      | 0     |
| Placebo                       | 0<br>.      | 0<br>.      | 0     |
| <b>Total</b>                  | 93          | 52          | 145   |

## The MEANS Procedure

Analysis Variable : Age

| data_set      | Treatment         | N Obs | N   | Mean       | Std Dev    | Minimum    | Lower Quartile | Median     | Upper Quartile | Maximum    |
|---------------|-------------------|-------|-----|------------|------------|------------|----------------|------------|----------------|------------|
| Leukine Study | Leukine           | 20    | 20  | 66.9500000 | 6.4845971  | 56.0000000 | 62.0000000     | 67.5000000 | 71.0000000     | 80.0000000 |
|               | Placebo           | 20    | 20  | 70.1500000 | 6.4176976  | 55.0000000 | 66.0000000     | 72.5000000 | 74.5000000     | 78.0000000 |
| Bio AD        | External AD       | 13    | 13  | 66.9230769 | 9.0596315  | 54.0000000 | 57.0000000     | 68.0000000 | 73.0000000     | 81.0000000 |
|               | External Controls | 69    | 69  | 69.5072464 | 6.3630902  | 53.0000000 | 65.0000000     | 70.0000000 | 73.0000000     | 83.0000000 |
|               | External MCI      | 32    | 32  | 73.6562500 | 5.8287905  | 63.0000000 | 70.0000000     | 73.5000000 | 78.5000000     | 87.0000000 |
| HTP           | External Controls | 103   | 103 | 28.1242984 | 15.2107619 | 1.7998047  | 14.5996094     | 27.6992188 | 38.6953125     | 61.2968750 |
|               | External T21      | 316   | 316 | 23.1516932 | 12.2932819 | 0.9772949  | 13.9492188     | 22.7968750 | 31.7656250     | 57.5937500 |
| Nair          | External Controls | 145   | 145 | 40.8688578 | 18.9390208 | 16.3984375 | 24.5000000     | 35.7968750 | 54.8984375     | 85.8906250 |
